# Supplementary material
Source: bioRxiv or medRxiv preprint supplement (https://www.biorxiv.org/highwire/filestream/32402/field_highwire_adjunct_files/0/112110-1.pdf)
Supplement: Supplementary file [file 112110-1.pdf]

## Supplementary Materials

### **A microfluidic biodisplay**

Francesca Volpetti<sup>1</sup>, Ekaterina Petrova<sup>1</sup>, & Sebastian J. Maerkl\*

<sup>1</sup>these authors contributed equally

Institute of Bioengineering, School of Engineering, Ecole Polytechnique Federale de Lausanne

\*Correspondence should be addressed to SJM ([sebastian.maerkl@epfl.ch](mailto:sebastian.maerkl@epfl.ch))

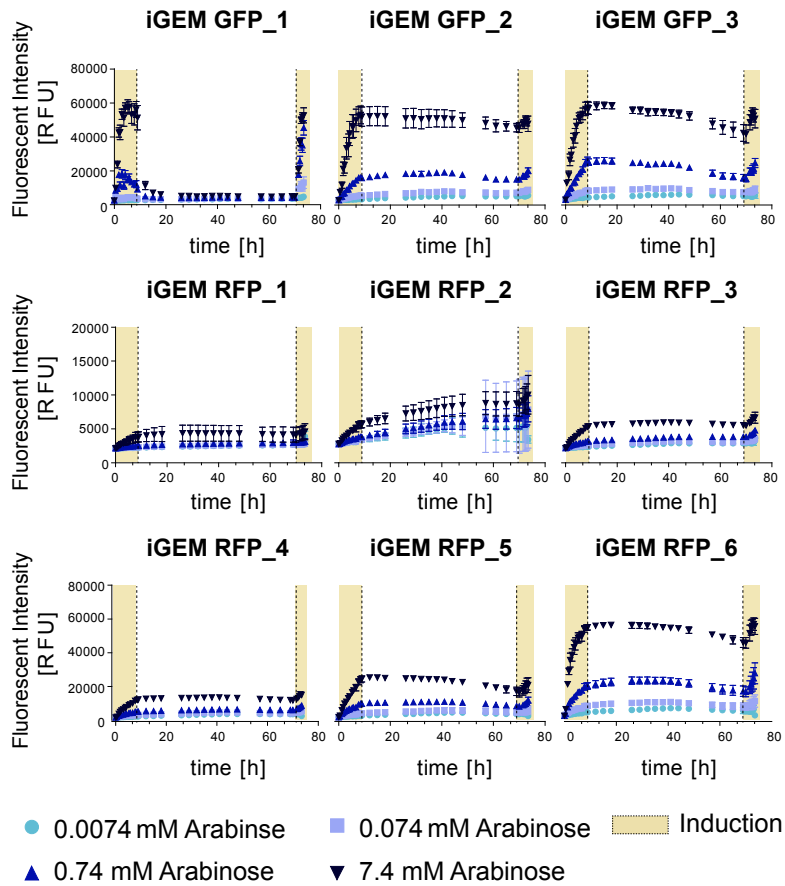

**Supplementary Figure 1.** Biodisplay for strain characterization at 37°C. Fluorescent intensity of GFP or RFP expression of nine different arabinose sensitive *E. coli* strains. The cells were induced twice with 4 different concentrations of arabinose (0.0074 mM, 0.074 mM, 0.74 mM and 7.4 mM). The yellow background indicates the induction intervals. The microfluidic chip was heated to 37°C during the experiment.

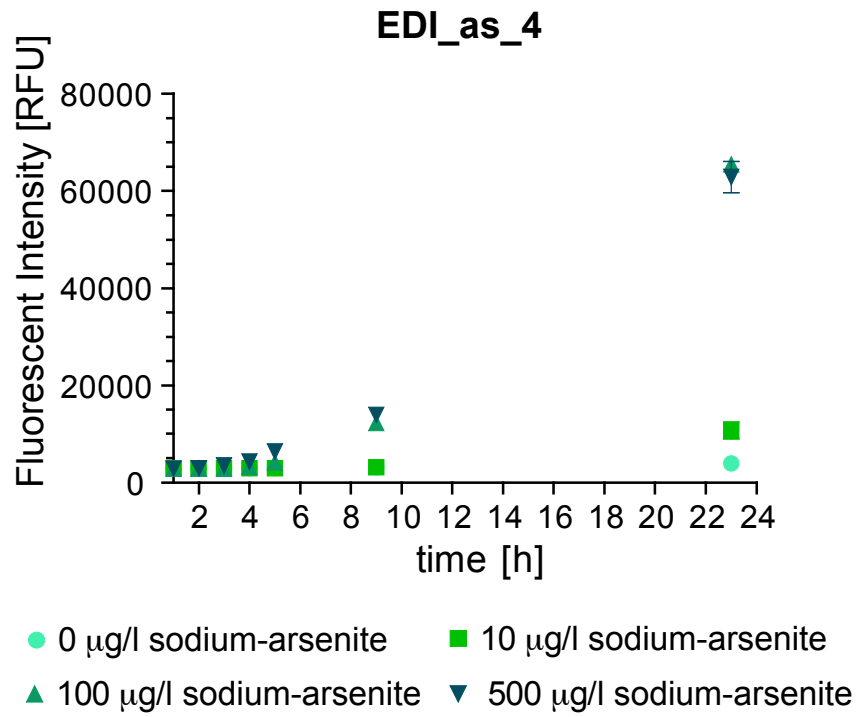

**Supplementary Figure 2.** Arsenic-responsive *E. coli*, EDI\_as\_4, was spotted on the chip and 4 different concentrations of sodium-arsenite in LB were sampled for 24 hours. GFP expression was monitored over time using a Nikon microscope.

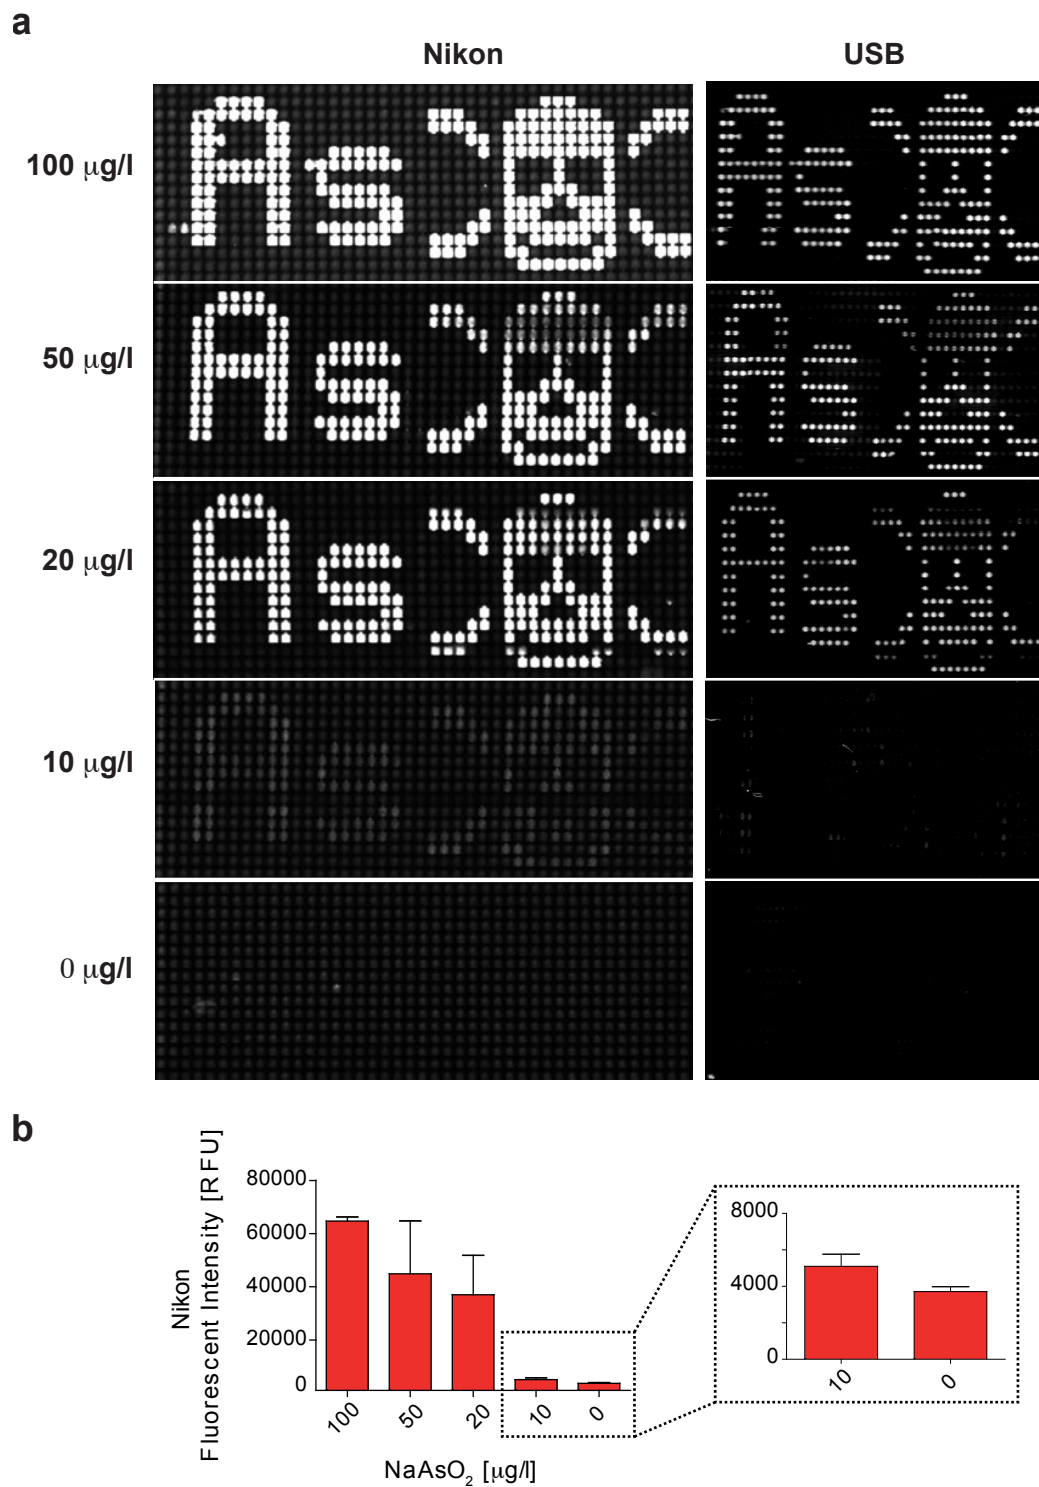

**Supplementary Figure 3.** Arsenic bioassay. **(a)** Fluorescent images taken using Nikon and USB microscope after 24 hours of induction with different concentrations of sodium-arsenite (100  $\mu\text{g/l}$ , 50  $\mu\text{g/l}$ , 20  $\mu\text{g/l}$ , 10  $\mu\text{g/l}$  and 0  $\mu\text{g/l}$ ). Each concentration was sampled in different devices. **(b)** Quantitation of the fluorescent signal, after 24 hours of induction and measured with the Nikon microscope.

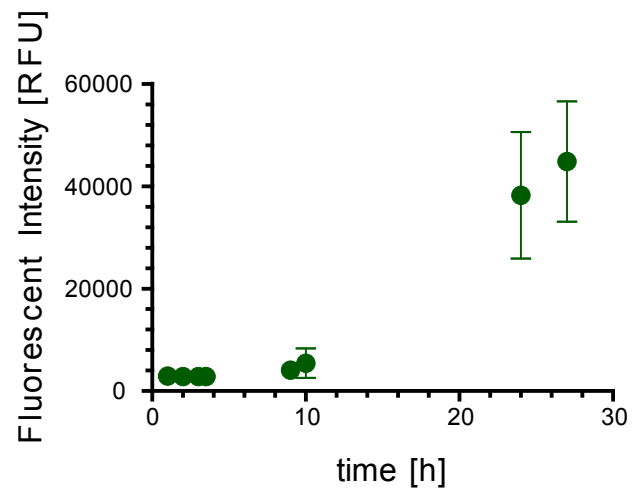

**Supplementary Figure 4.** Arsenic biodisplay. Arsenic-responsive *E. coli* was spotted in a “As” and a “skull and crossbones” pattern. 20  $\mu\text{g/l}$  of sodium-arsenite in tap water was sampled and GFP expression monitored over time using a Nikon microscope.

**a**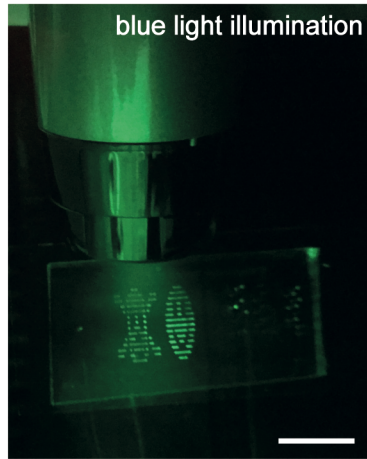**b**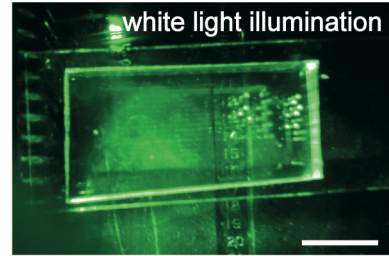

**Supplementary Figure 5.** Cellphone image acquisition. **(a)** The microfluidic chip was illuminated using the LEDs of a USB microscope (excitation at 480 nm), a band-pass filter centered at 530nm with a 40 nm bandwidth was placed in front of the camera of the cellphone. **(b)** The same device was illuminated by white light and imaged using the cellphone and emission filter as in **(a)**. Scale bar 1cm.

| Identifier                 | Name                                                               | Resistance      | Inducer   | Reporter |
|----------------------------|--------------------------------------------------------------------|-----------------|-----------|----------|
| BBa_I13517                 | iGEM RFP_1                                                         | Chloramphenicol | Arabinose | RFP      |
| BBa_K1333301               | iGEM RFP_2                                                         | Chloramphenicol | Arabinose | RFP      |
| BBa_K1333300               | iGEM RFP_3                                                         | Chloramphenicol | Arabinose | RFP      |
| BBa_K577004                | iGEM RFP_4                                                         | Chloramphenicol | Arabinose | RFP      |
| BBa_K577882                | iGEM RFP_5                                                         | Chloramphenicol | Arabinose | RFP      |
| BBa_I13516                 | iGEM RFP_6                                                         | Chloramphenicol | Arabinose | RFP      |
| BBa_K750000                | iGEM GFP_1                                                         | Chloramphenicol | Arabinose | GFP      |
| BBa_K584000                | iGEM GFP_2                                                         | Chloramphenicol | Arabinose | GFP      |
| BBa_K577881                | iGEM GFP_3                                                         | Chloramphenicol | Arabinose | GFP      |
| pBW101ParsR-gfp (78636)    | EDI_as_1                                                           | Kanamycin       | Arsenic   | GFP      |
| pBW102ParsR-Amp32C (78637) | EDI_as_2                                                           | Kanamycin       | Arsenic   | GFP      |
| pBW103ParsR-Amp30C (78638) | EDI_as_3                                                           | Kanamycin       | Arsenic   | GFP      |
| pBW300ParsR-Amp32T (78652) | EDI_as_4                                                           | Kanamycin       | Arsenic   | GFP      |
| pIIUN gfp                  | UNIL_1                                                             | Kanamycin       | Arsenic   | GFP      |
| pAAUN gfp                  | UNIL_2                                                             | Kanamycin       | Arsenic   | GFP      |
| pVUN gfp                   | UNIL_3                                                             | Kanamycin       | Arsenic   | GFP      |
| pLtet0UN gfp               | UNIL_4                                                             | Kanamycin       | Arsenic   | GFP      |
| pPR arsR abs gfp           | UNIL_5                                                             | Kanamycin       | Arsenic   | GFP      |
| BGSC 3A40                  | Bacillus subtilis<br>subsp. Subtilis<br>amyE::Physpank-<br>mCherry |                 | IPTG      | mCherry  |
| BGSC 3A39                  | Bacillus subtilis<br>subsp. Subtilis<br>amyE::Physpank-<br>GFP     |                 | IPTG      | GFP      |

**Supplementary Table 1.** List of plasmids and strains used in this work.
